# Supplementary material for: Tumor vascular endothelial cells promote immune escape by upregulating PD-L1 expression via crosstalk between NF-κB and STAT3 signaling pathways in nasopharyngeal carcinoma
Source: Springer Nature journal article supplement (doi:10.1038/s41419-025-07444-z), 2025-02-25
Supplement: MOESM1 [file 41419_2025_7444_MOESM1_ESM.pdf]

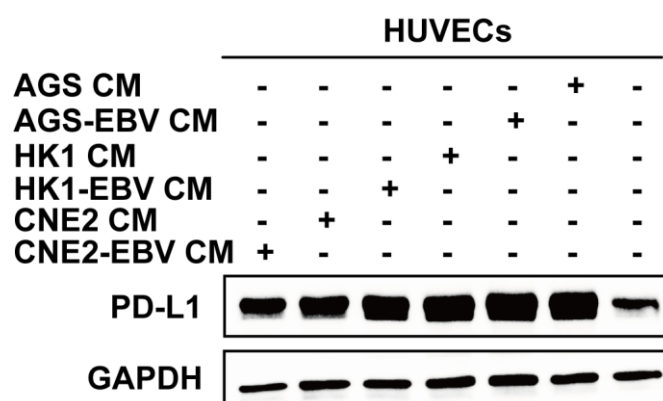

**Supplementary Fig. 1.** PD-L1 expression in HUVECs treated with supernatants from EBV- and EBV+ tumor cells for 48h using WB detection.

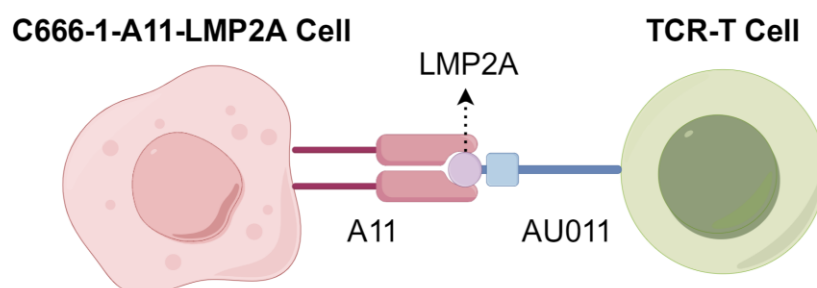

**Supplementary Fig. 2.** Schematic diagram depicting TCR-T cells recognising C666-1-A11-LMP2A tumour cells.

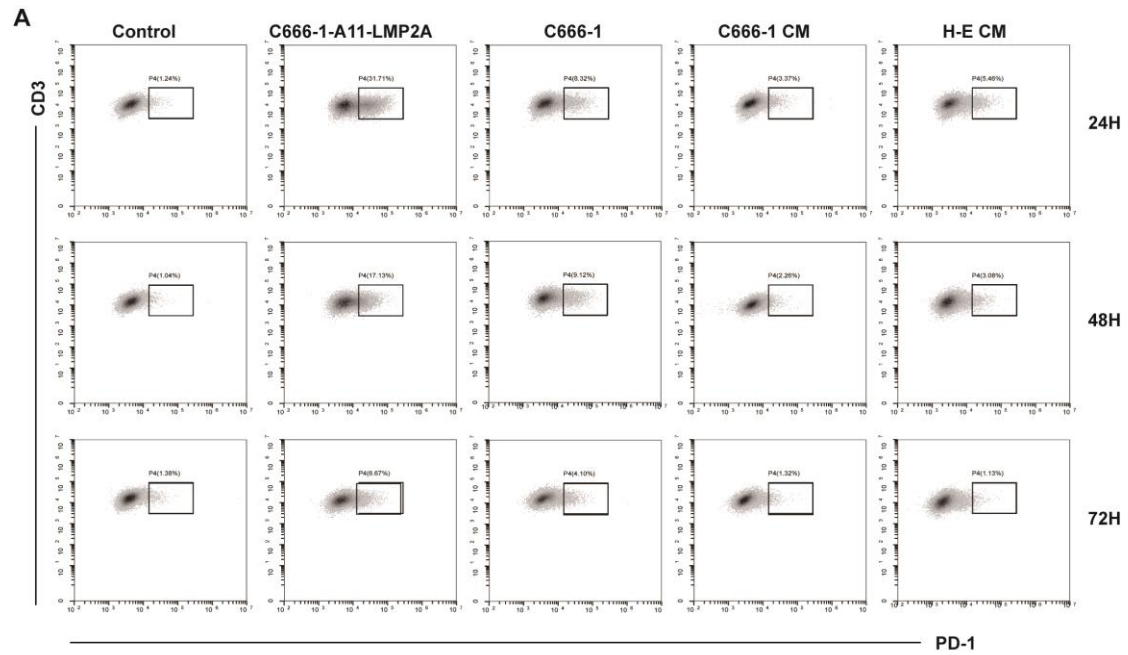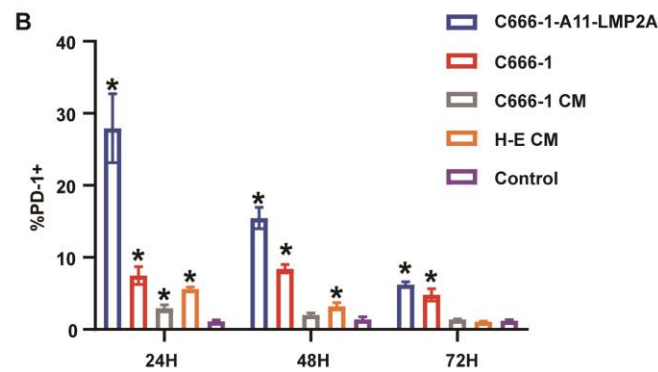

**Supplementary Fig. 3. Expression of PD-1 on HUVECs after co-culture with C666-1-A11-LMP2A, C666-1, C666-1 CM, and H-E CM for 24h, 48h, and 72h, respectively. a) Representative images of Flow cytometry. b) Statistical plot of flow cytometry results. Data are mean  $\pm$  SD,  $n=3$ , two-tailed Student's  $t$  test.  $*P < 0.05$ .**

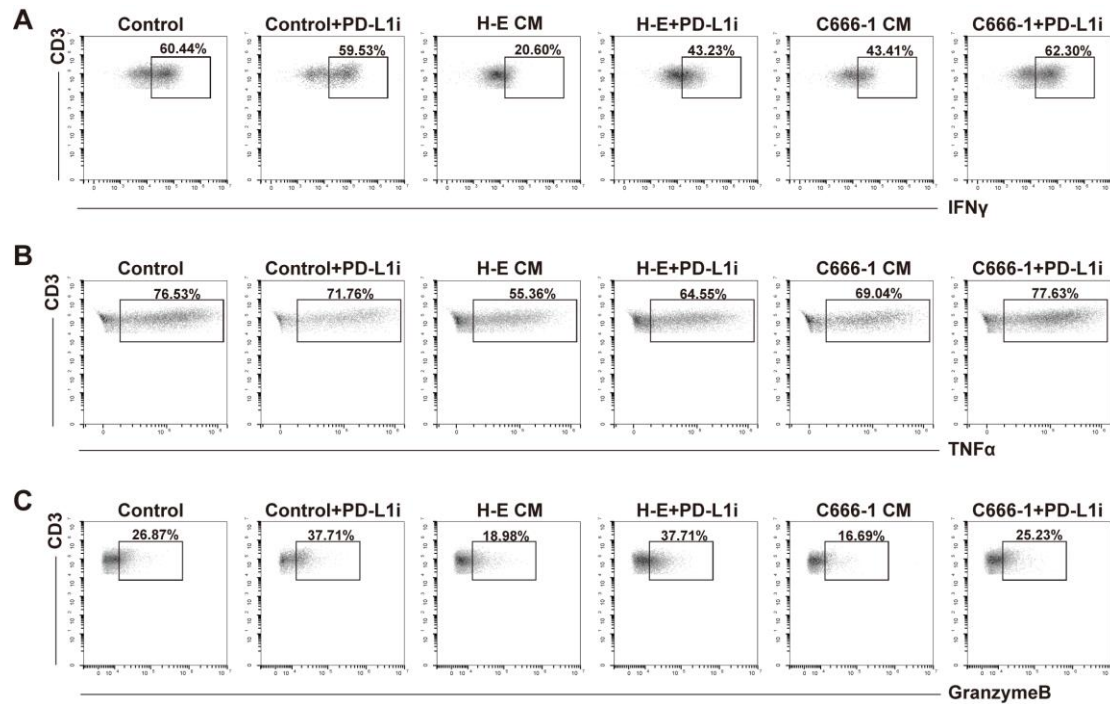

**Supplementary Fig. 4. Representative images of flow cytometry of cytokines in TCR-T cells after different treatments.** **a)** Representative images of flow cytometry of IFN- $\gamma$  in TCR-T cells after different treatments. **b)** Representative images of flow cytometry of TNF- $\alpha$  in TCR-T cells after different treatments. **c)** Representative images of flow cytometry of GranzymeB in TCR-T cells after different treatments. *Control* indicated TCR-T co-incubated with control HUVECs, *H-E* indicated TCR-T co-incubated with HK1-EBV CM-treated HUVECs, C666-1 indicated TCR-T co-incubated with C666-1 CM-treated HUVECs, and PD-L1i indicated incorporation of PD-L1 inhibitor.

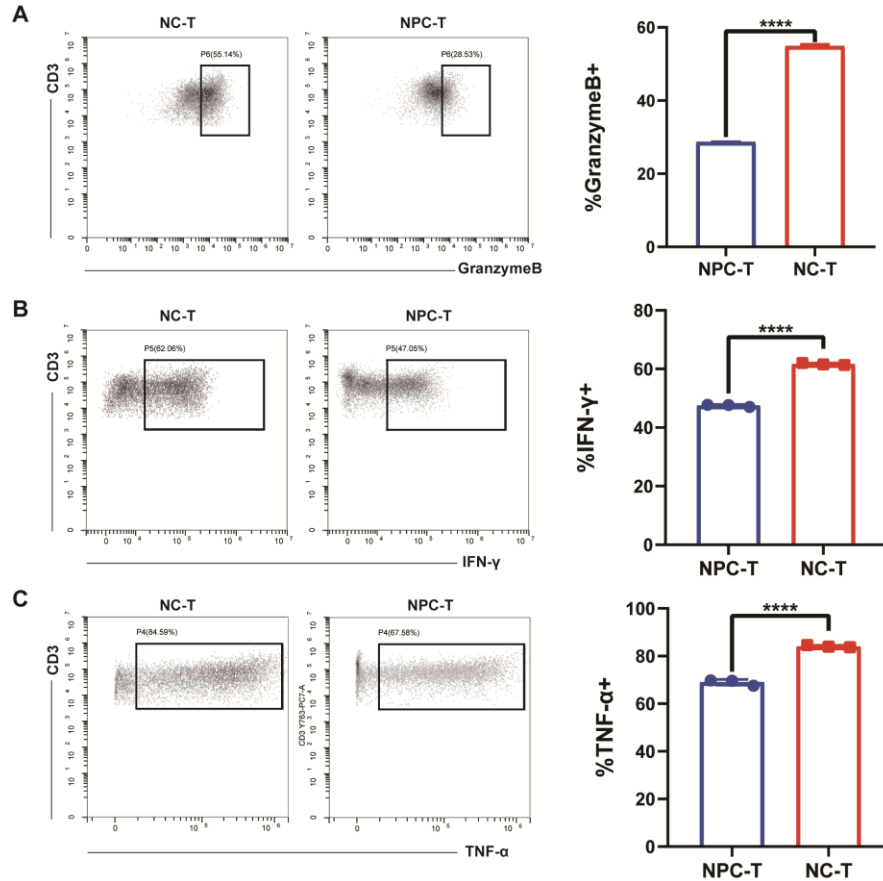

**Supplementary Fig. 5. Representative images of flow cytometry and statistical plots of cytokines in NC-T cells and NPC-T cells after co-incubation with CM-HUVECs. a)** Representative images of flow cytometry and statistical plot of GranzymeB in NC-T cells and NPC-T cells after co-incubation with CM-HUVECs. **b)** Representative images of flow cytometry and statistical plot of IFN-γ in NC-T cells and NPC-T cells after co-incubation with CM-HUVECs. **c)** Representative images of flow cytometry and statistical plot of TNF-α in NC-T cells and NPC-T cells after co-incubation with CM-HUVECs. Data are mean ± SD, n=3, two-tailed Student's t test, \*\*\*\* $P < 0.0001$ .

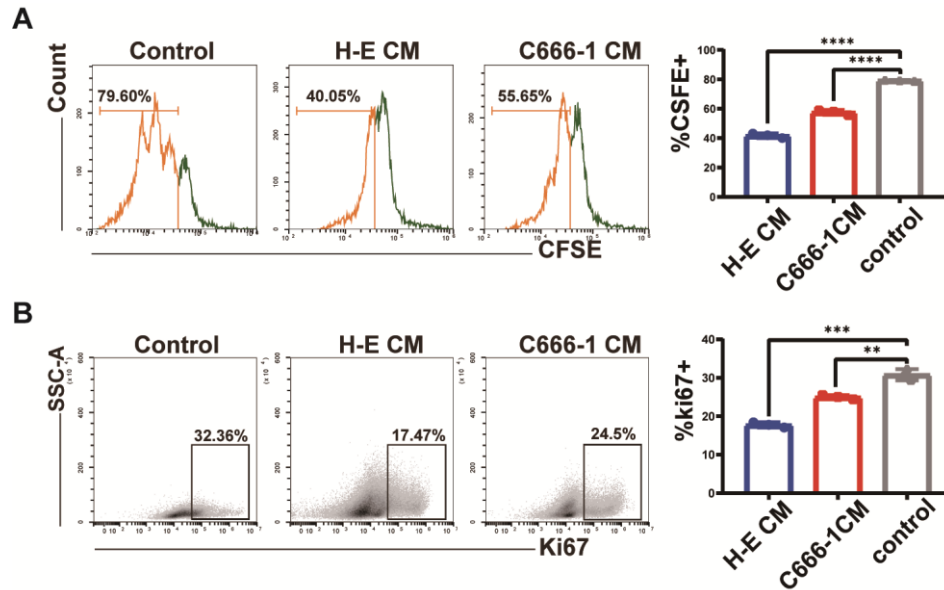

**Supplementary Fig. 6. Effect of CM-treated versus untreated HUVECs on the proliferative capacity of TCR-T cells.** *a*, *b*) CSFE staining *a* and Ki67 flow cytometry *b* results suggested that CM-treated HUVECs inhibited the proliferative capacity of TCR-T cells. *Control* indicated untreated HUVECs. *H-E CM* indicated H-E CM-treated HUVECs. *C666-1 CM* indicated C666-1 CM-treated HUVECs. Data are mean  $\pm$  SD,  $n=3$ , two-tailed Student's *t* test.  $**P < 0.01$ ,  $***P < 0.001$ ,  $****P < 0.0001$ .

**Supplementary Table 1. The AUCs of classification models for predicting OS and PFS of patients with NPC.**

| OS                    |                                 | PFS                   |                                 |
|-----------------------|---------------------------------|-----------------------|---------------------------------|
| Classification models | AUC                             | Classification models | AUC                             |
| TEC-PD-L1             | 0.7733 (95%CI [0.7055-0.8412] ) | TEC-PD-L1             | 0.6981 (95%CI [0.6305-0.7657] ) |
| TC-PD-L1              | 0.5927 (95%CI [0.5150-0.6705] ) | TC-PD-L1              | 0.5695 (95%CI [0.4974-0.6417] ) |
| Dual-scoring          | 0.7123 (95%CI [0.6445-0.7800] ) | Dual-scoring          | 0.6448 (95%CI [0.5739-0.7156] ) |
